# Supplementary material for: Antiferromagnetic ordering and signatures of enhanced spin-frustration in honeycomb-layered tellurates with Ag bilayers
Source: Royal Society of Chemistry journal article supplement (doi:10.1039/d3tc01915b), 2023-01-01
Supplement: d3tc01915b1.pdf [file d3tc01915b1.pdf]

## Supplementary information

for

### Antiferromagnetic ordering and signatures of enhanced spin-frustration in honeycomb-layered tellurates with Ag bilayers

Sachio Komori<sup>1\*</sup>, Kohei Tada<sup>2\*</sup>, Noboru Taguchi<sup>2</sup>, Tomoyasu Taniyama<sup>1</sup>, Titus Masese<sup>2\*</sup>

<sup>1</sup>Department of Physics, Nagoya University, Furo-cho, Chikusa-ku, Nagoya 464-8602, Japan

<sup>2</sup>Research Institute of Electrochemical Energy, National Institute of Advanced Industrial Science and Technology, 1-8-31 Midorigaoka, Ikeda, Osaka 563-8577, Japan

\* komori.sachio.h0@f.mail.nagoya-u.ac.jp \*k-tada@aist.go.jp \*titus.masese@aist.go.jp

#### 1. Interslab exchange coupling in honeycomb-layered tellurates

To investigate an interslab magnetic exchange coupling of (Te, *M*)-O magnetic layers through a cationic layer (denoted X layer), we have calculated the total energy difference between layered-antiferromagnetic (L-AFM) and ferromagnetic (FM) ordering [ $\Delta E = E(\text{FM}) - E(\text{L-AFM})$ ] for various X layers, which are plotted in Fig. S1 (left-axis). Larger  $\Delta E$  indicates larger interslab exchange coupling (the L-AFM state is more stable than the corresponding FM state due to the exchange coupling).  $\Delta E$  exponentially decreases with increasing thickness of the X layer (right-axis of Fig. S1). Although the ionic radius of Ag<sup>+</sup> is comparable to Na<sup>+</sup>, a dumbbell like straight coordination through the *d*-orbital of Ag<sup>+</sup> results in a large interslab distance and a stronger suppression of the interslab magnetic exchange coupling in Ag<sub>2-x</sub>M<sub>2</sub>TeO<sub>6</sub> (0 < x < 2) than that in Na<sub>2</sub>M<sub>2</sub>TeO<sub>6</sub>. Moreover, the interslab distance of Ag<sub>6</sub>M<sub>2</sub>TeO<sub>6</sub> is even longer (9 Å<sup>26</sup>) than that of Ag<sub>2-x</sub>M<sub>2</sub>TeO<sub>6</sub> (6 Å<sup>26</sup>), implying a further suppression of the magnetic exchange coupling due to the presence of Ag bilayers.

The exchange-correlation functional used for the density functional theory (DFT) calculation was the generalised gradient approximation formula of Perdew-Burke-Ernzerhof (GGA-PBE) [1], and the basis set was plane-wave with projector-augmented-wavefunction (PAW) method [2]. The electrons in the inner core regions were treated by PAW, and the numbers of valence electrons of Li, Na, K, Rb, Ag, Ni, Te, and O were 1 (2s<sup>1</sup>), 1 (3s<sup>1</sup>), 7 (3p<sup>6</sup>4s<sup>1</sup>), 7 (4p<sup>6</sup>5s<sup>1</sup>), 11 (4d<sup>10</sup>5s<sup>1</sup>), 10 (3d<sup>8</sup>4s<sup>2</sup>), 6 (5s<sup>2</sup>5p<sup>4</sup>) and 6 (2s<sup>2</sup>2p<sup>4</sup>), respectively. The energy cut-offs for wavefunction and augmented charge were 500 eV and 2400 eV. To correct repulsions among the 3d electrons of Ni, DFT+*U* method was used (the applied *U* value was 4.0 eV) [3]. Dispersion forces were corrected by DFT-D3 scheme using the parameter with

Becke-Jonson damping [4]. The sampled  $k$ -points were on the  $\Gamma$ -centred mesh of  $5 \times 5 \times 3$ . The DFT calculations were performed by VASP programme [5].

Due to the non-subtleties of pseudo-spin simulation using Kohn-Sham formalism in VASP, we considered the simulation of the recently predicted Ag degenerate states in Ag bilayers<sup>26</sup> as beyond our present scope. Even if a pseudo-spin moment of Ag bilayered structures presents, the small moment is unlikely to affect the interslab exchange coupling and therefore the Ag-bilayered  $\text{Ag}_6\text{Mg}_2\text{TeO}_6$  should also follow the trend in Fig. S1.

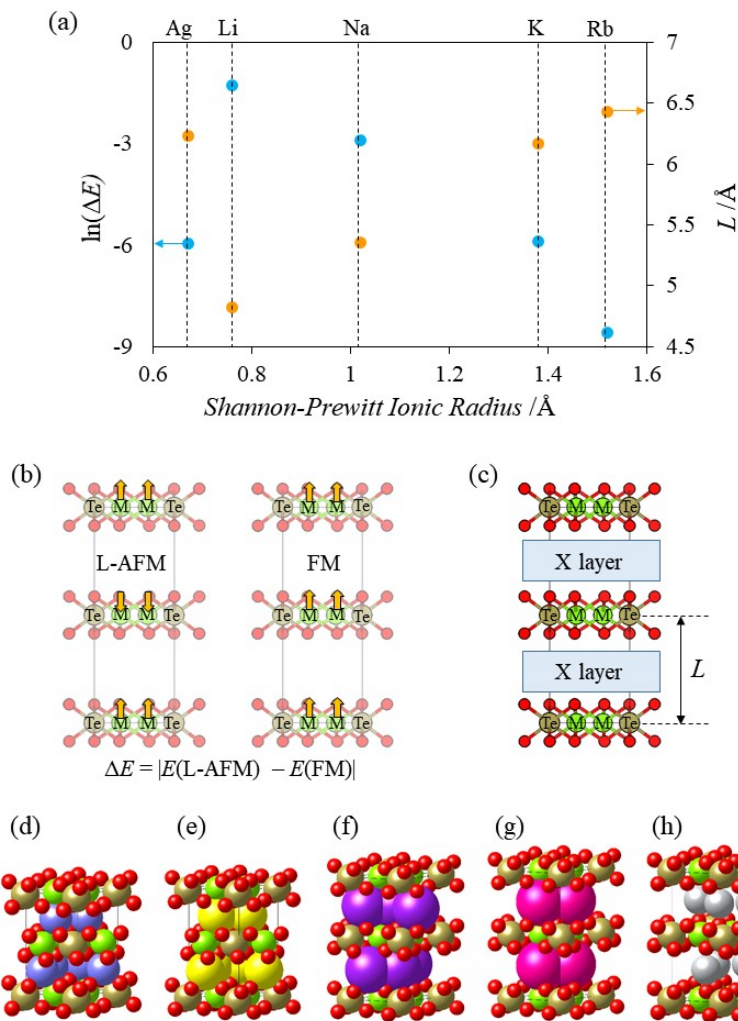

**Fig. S1** (a) Difference of the total energy between FM and layered (L)-AFM states (left-axis) and interslab distance (right-axis) for mono-layered  $\text{X}_2\text{M}_2\text{TeO}_6$  with a single cationic X layer ( $\text{X} = \text{Li}, \text{Na}, \text{K}, \text{Rb}$ , and  $\text{Ag}$ ). (b) Schematic views of L-AFM and FM spin configurations. (c) Schematic view of (Te, M)-O magnetic layers separated by a distance  $L$ . Crystal structures of  $\text{X}_2\text{M}_2\text{TeO}_6$  with  $\text{X} =$  (d) Li, (e) Na, (f) K, (g) Rb, and (h) Ag.

## 2. Magnetic properties of $\text{Ag}_2\text{Mg}_2\text{TeO}_6$

To investigate the presence of pseudo-spins in the Ag-bilayers, we measured magnetic properties of  $\text{Ag}_2\text{Mg}_2\text{TeO}_6$  ( $M = \text{Mg}$ ) which does not have magnetic honeycomb slabs and therefore suitable to detect the moment from the pseudo-spins. Figure S2(a) shows the magnetic susceptibility ( $\chi$ ) versus temperature ( $T$ ) curve at the magnetic field ( $H$ ) of 100 Oe.  $\chi$  at 300 K is about 3 orders of magnitude smaller than that of  $M = \text{Co}$ ,  $\text{Co}_{0.5}\text{Ni}_{0.5}$ , and Ni [Figs. 2(a)-(c) in the main paper]. Although an increase of  $\chi$  with decreasing  $T$  is observed, the  $T$ -dependence deviates from the Curie-Weiss law, suggesting that a paramagnetic moment is not predominant in  $M = \text{Mg}$ , which is in sharp contrast to  $M = \text{Co}$ ,  $\text{CoNi}$ , and Ni. From moment versus field [ $m(H)$ ] curve at 10 K [Fig. S2(b)], we identify a small fraction of ferromagnetic ordering with the saturation moment and field of about  $0.1 \text{ emu mol}^{-1}$  and 1 kOe, respectively. The ferromagnetic ordering is also observable in  $M = \text{Co}$ ,  $\text{Co}_{0.5}\text{Ni}_{0.5}$ , and Ni, which manifests as a peak near zero field in their  $dm/dH$  curve as shown in Fig. S2(c). However, further study is necessary to clarify the relation between the ferromagnetic order and the pseudo-spins in the Ag bilayers.

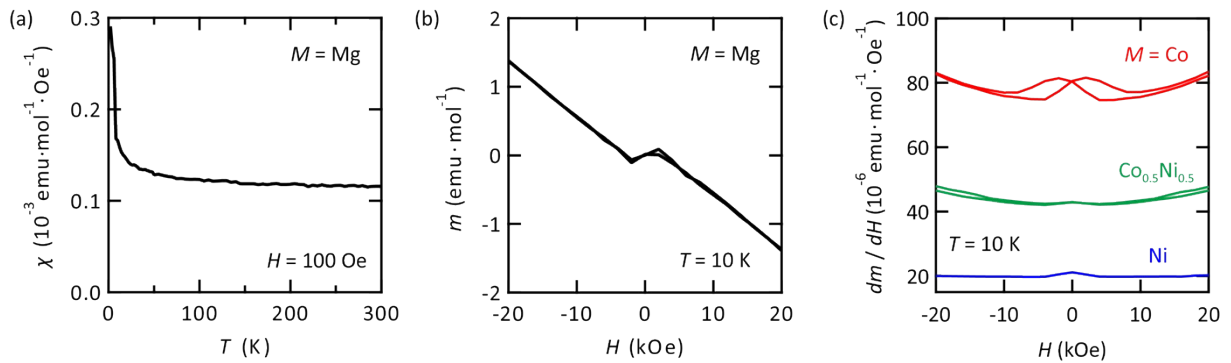

**Fig. S2** (a)  $\chi$  versus  $T$  at  $H = 100 \text{ Oe}$  measured during cooling and (b)  $m$  versus  $H$  at  $T = 10 \text{ K}$  for  $\text{Ag}_2\text{Mg}_2\text{TeO}_6$  ( $M = \text{Mg}$ ) polycrystalline powders. (c)  $dm/dH$  versus  $H$  for at  $T = 10 \text{ K}$  for  $M = \text{Co}$  (the red curve),  $\text{Co}_{0.5}\text{Ni}_{0.5}$  (the green curve), and Ni (the blue curve).

## 3. Estimation of the spin-flop transition field

In Fig. S3(a), we plot the temperature dependence of the  $m(H)$  curve for  $M = \text{Co}_{0.5}\text{Ni}_{0.5}$ . At low temperatures (4 K and 20 K) below the Néel temperature ( $T_N$ ), the  $m(H)$  curve is non-linear, indicating the presence of a broad spin-flop transition. Figure S3(b) shows the  $m(H)$  and  $dm/dH(H)$  curves at 10 K for  $M = \text{Co}_{0.5}\text{Ni}_{0.5}$ . We have estimated the transition field from the field giving the maximum of  $dm/dH$

[6] ( $H = 60$  kOe). We note that the transition can occur in a broad field range around  $H = 60$  kOe due to factors such as a size variation of the polycrystalline powder sample.

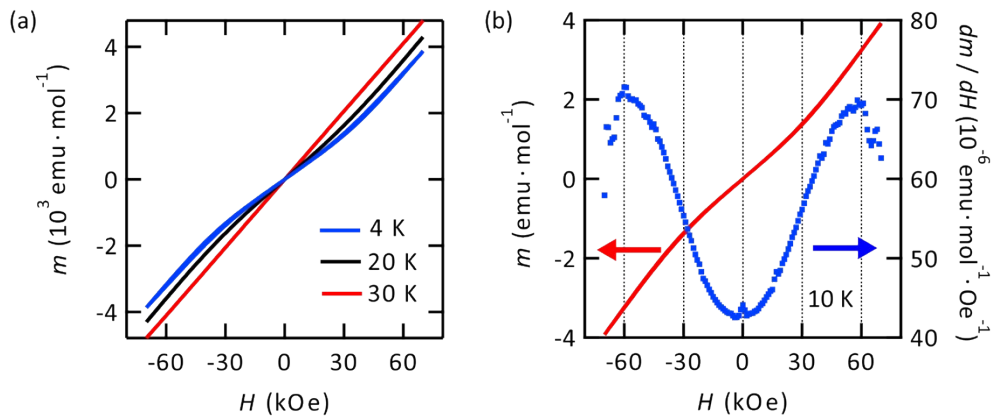

**Fig. S3** (a)  $m$  versus  $H$  at  $T = 4$  (the blue curve), 20 (the black curve), 30 K (the red curve) for  $M = \text{Co}_{0.5}\text{Ni}_{0.5}$ . (b)  $m$  (the red curve; left-axis) and  $dm/dH$  (the blue dots; right-axis) versus  $H$  at  $T = 10$  K for  $M = \text{Co}_{0.5}\text{Ni}_{0.5}$ .

[1] Perdew, J. P., Burke, K. & Ernzerhof, M. Generalized Gradient Approximation Made Simple. *Phys. Rev. Lett.* 77, 3865 (1996).

[2] Kresse, G., and Joubert, D, From ultrasoft pseudopotentials to the projector augmented-wave method. *Phys. Rev. B* 59, 1758 (1999).

[3] Blöchl, P. E., Projector augmented-wave method, *Phys. Rev. B*, 50, 17953 (1994); Dudarev, S. L. et al. Electron-energy-loss spectra and the structural stability of nickel oxide: An LSDA+U study. *Phys. Rev. B* 57, 1505 (1998).

[4] Grimme, S., Antony, J., Ehrlich, S. & Krieg, H. A consistent and accurate ab initio parametrization of density functional dispersion correction (DFT-D) for the 94 elements H-Pu. *J. Chem. Phys.* 132, 154104 (2010); Grimme, S., Ehrlich, S. & Goerigk, L. Effect of the damping function in dispersion corrected density functional theory. *J. Comput. Chem.* 32, 1456 (2011).

[5] Kresse, G., and Hafner, J. Ab initio molecular dynamics for liquid metals. *Phys. Rev. B* 47, 558 (1993); Kresse, G., and Hafner, J. Ab initio molecular-dynamics simulation of the liquid-metal–amorphous-semiconductor transition in germanium. *Phys. Rev. B* 49, 14251 (1994); Kresse, G., and Furthmüller, J. Efficient iterative schemes for ab initio total-energy calculations using a plane-wave basis set. *Phys.*

Rev. B 54, 11169 (1996); Kresse, G. and Furthmüller, J. Efficiency of ab-initio total energy calculations for metals and semiconductors using a plane-wave basis set. *Comput. Mater. Sci.* 6, 15–50 (1996).

[6] Viciu, L., Huang, Q., Morosan, E., Zandbergen, H. W., Greenbaum, N. I., McQueen, T., and Cava, R. J., Structure and basic magnetic properties of the honeycomb lattice compounds  $\text{Na}_2\text{Co}_2\text{TeO}_6$  and  $\text{Na}_3\text{Co}_2\text{SbO}_6$ . *J. Solid State Chem.* 180, 1060–1067 (2007).
